# Supplementary material
Source: PubMed Central journal article supplement (PMC4994794)
Supplement: DS_10.1177_0706743716660290.pdf [file DS_10.1177_0706743716660290.pdf]

## Section 5. Complementary and Alternative Medicine Treatments.

### Supplemental Online eTables

#### Supplemental eTable 5.1. Evidence for light therapy.

| Authors           | Year  | Type                         | n                | Effect Size                                                                                            | Key Findings                                                                                                                                     |
|-------------------|-------|------------------------------|------------------|--------------------------------------------------------------------------------------------------------|--------------------------------------------------------------------------------------------------------------------------------------------------|
| Perera et al.     | 2016  | Meta-analysis                | 20               | SMD = -0.41, 95% CI: -0.64, -0.18                                                                      | Superior to placebo/control as monotherapy or augmentation in non-seasonal mild to severe MDD                                                    |
| Bauer et al.      | 2013  | Systematic review            | NR               | Not reported                                                                                           | Supports 2009 recommendations for seasonal MDD                                                                                                   |
| Dirmaier et al.   | 2012  | Systematic review            | NR               | Not reported                                                                                           | Supports 2009 recommendations                                                                                                                    |
| Güleç             | 2011  | Systematic review            | NR               | Not reported                                                                                           | Supports 2009 recommendations; effective for seasonal and non-seasonal depression                                                                |
| Mårtensson et al. | 2015  | Meta-analysis                | 10 trials, n=714 | SMD = -0.54, 95% CI: 0.95, 0.13                                                                        | Generally effective for moderate seasonal MDD, but evidence not unequivocal                                                                      |
| Pail et al.       | 2011  | Systematic review            | NR               | Not reported                                                                                           | Supports 2009 recommendations for mild to severe MDD                                                                                             |
| Lam et al.        | 2015  | RCT                          | 122              | 1. $d = 0.80$ ; 95% CI: 0.28 to 1.31; $p = 0.006$<br>2. $d = 1.11$ ; 95% CI: 0.54 to 1.64; $p < 0.001$ | 1. Monotherapy superior to placebo for non-seasonal moderate MDD<br>2. Augmentation superior to placebo for non-seasonal MDD                     |
| Martiny et al.    | 2012  | RCT                          | 75               | OR = 2.8; 95% CI: 1.1–7.3, $p = 0.04$                                                                  | Augmentation with chronotherapeutic techniques (LT, SD, wake therapy) superior to augmentation with exercise for mild to severe non-seasonal MDD |
| Martiny et al.    | 2015  | RCT (follow-up)              | 75               | OR = 2.6, CL: 1.3–5.6, $p = 0.01$                                                                      | Superiority of chronotherapeutic techniques as augmentation maintained after 20 weeks of treatment for mild to severe non-seasonal MDD           |
| Rohan et al.      | 2015a | RCT                          | 177              | $\chi^2 = 0.003$ and 1.06, $p = 0.96$ and 0.30                                                         | Similar efficacy to CBT (as monotherapy or augmentation) for moderate seasonal MDD                                                               |
| Rohan et al.      | 2015b | RCT (naturalistic follow-up) | 177              | Fewer recurrences for CBT (27.3%) than light therapy (45.6%)                                           | CBT superior in relapse prevention at two-year follow-up for moderate seasonal MDD                                                               |

**Supplemental eTable 5.2. Evidence for sleep deprivation.**

| Authors                | Year | Type              | n  | Effect Size                           | Key Findings                                                                                                                                                        |
|------------------------|------|-------------------|----|---------------------------------------|---------------------------------------------------------------------------------------------------------------------------------------------------------------------|
| Ravindran and da Silva | 2013 | Systematic review | 16 | Not reported                          | Supports use of SD as augmentation to antidepressants in mild to severe MDD                                                                                         |
| Kundermann et al.      | 2009 | RCT               | 18 | Not significant                       | No significant clinical effect as augmentation to psychotherapy to moderate to severe MDD                                                                           |
| Martiny et al.         | 2012 | RCT               | 75 | OR = 2.8; 95% CI: 1.1–7.3, $p = 0.04$ | Augmentation to antidepressants with chronotherapeutic techniques (SD, LT, wake therapy) superior to augmentation with exercise for non-seasonal mild to severe MDD |

**Supplemental eTable 5.3. Evidence for exercise.**

| Authors          | Year | Type          | n                                         | Effect Size                                                                                                                                                                             | Key Findings                                                                                                                                                                             |
|------------------|------|---------------|-------------------------------------------|-----------------------------------------------------------------------------------------------------------------------------------------------------------------------------------------|------------------------------------------------------------------------------------------------------------------------------------------------------------------------------------------|
| Cooney et al.    | 2013 | Meta-analysis | 39 trials, n=2,326                        | 1. SMD = -0.62, 95% CI: -0.81 to -0.42; n=35<br>2. SMD = -0.03, 95% CI: -0.32 to 0.26, n=7<br>3. SMD = -0.11, 95% CI: -0.34 to 0.12, n=4<br>4. SMD = -0.33, 95% CI: -0.63 to -0.03; n=8 | In mild to severe MDD,<br>1. Superior to no-treatment control conditions<br>2. Comparable to psychotherapy<br>3. Comparable to pharmacotherapy<br>4. Small effect for long-term benefits |
| Josefsson et al. | 2014 | Meta-analysis | 13 trials, n=720                          | Hedges' $g = -0.77$ , 95% CI: -1.14 to -0.41, $p < 0.001$                                                                                                                               | Superior to no-treatment control conditions and comparable to psychotherapy or pharmacotherapy for mild to moderate unipolar depression                                                  |
| Krogh et al.     | 2011 | Meta-analysis | 1. 13 trials, n=687<br>2. 5 trials, n=328 | 1. SMD = -0.40, 95% CI: -0.66 to -0.14<br>2. SMD = -0.01, 95% CI: -0.28 to 0.26                                                                                                         | For mild to moderate MDD,<br>1. Effective as augmentation in short-term<br>2. No beneficial effect for interventions longer than 10 weeks                                                |

|                     |      |                   |                    |                                                                  |                                                                                             |
|---------------------|------|-------------------|--------------------|------------------------------------------------------------------|---------------------------------------------------------------------------------------------|
| Rosenbaum et al.    | 2014 | Meta-analysis     | 20 trials, n=1,298 | SMD = 0.80, 95% CI: 0.47 to 1.13, $p < 0.001$                    | Superior to TAU, waitlist, or placebo conditions for moderate to severe depressive symptoms |
| Silveira et al.     | 2013 | Meta-analysis     | 10 trials, n=758   | SMD = 0.61, 95% CI: -0.88 to -0.33, $p < 0.001$                  | Superior to control conditions for mild to moderate MDD                                     |
| Danielsson et al.   | 2013 | Systematic review | 14                 | SMD = -0.06, 95% CI: -0.36 to 0.23                               | Comparable to pharmacotherapy for mild to severe MDD                                        |
| Nyström et al.      | 2015 | Systematic review | 12                 | Not reported                                                     | Effective as monotherapy for mild to severe MDD                                             |
| Stanton and Reaburn | 2013 | Systematic review | 5 trials, n=?      | Mean frequency = 3.8 sessions/wk; mean duration = 9.3 wks (4-12) | Examined program variables only                                                             |
| Carneiro et al.     | 2015 | RCT               | 26                 | 1.04, 95% CI: -26.48 to -1.45, $p = 0.031$                       | Exercise as augmentation superior to TAU for women with mild to moderate MDD or dysthymia   |

#### Supplemental eTable 5.4. Evidence for Yoga.

| Authors       | Year | Type          | n                | Effect Size                                    | Key Findings                                                      |
|---------------|------|---------------|------------------|------------------------------------------------|-------------------------------------------------------------------|
| Cramer et al. | 2013 | Meta-analysis | 12 trials, n=619 | SMD = -0.69, 95% CI: -0.99, -0.39; $p < 0.001$ | Effective as augmentation, compared to TAU for mild to severe MDD |

#### Supplemental eTable 5.5. Evidence for acupuncture.

| Authors      | Year | Type              | n                  | Effect Size                                       | Key Findings                                                                                                                                                              |
|--------------|------|-------------------|--------------------|---------------------------------------------------|---------------------------------------------------------------------------------------------------------------------------------------------------------------------------|
| Chan et al.  | 2015 | Meta-analysis     | 13 trials, n=1,046 | SMD = -2.52, 95% CI: 4.12 to 0.92, $p < 0.01$     | More effective in augmentation than medication alone for moderate to severe MDD                                                                                           |
| Smith et al. | 2010 | Systematic review | 30                 | Inconsistent findings                             | No consistent beneficial effect compared with waitlist or sham controls for mild to severe MDD                                                                            |
| Zhang et al. | 2010 | Meta-analysis     | 20 trials, n=1,998 | WMD = 0.31, 95% CI: -0.94-1.56, $p = 0.63$ ; n=16 | Acupuncture monotherapy as effective as medication alone, but not superior to sham for mild to severe MDD<br>Insufficient evidence for augmentation in mild to severe MDD |
| Wu et al.    | 2012 | Systematic review | 21                 | Not reported                                      | Beneficial as monotherapy and more effective in augmentation than medication alone, for mild to severe depression                                                         |

|                   |      |     |     |                                                                                                                                                                           |                                                                                                                                                                                     |
|-------------------|------|-----|-----|---------------------------------------------------------------------------------------------------------------------------------------------------------------------------|-------------------------------------------------------------------------------------------------------------------------------------------------------------------------------------|
| MacPherson et al. | 2013 | RCT | 755 | 1. $p = 0.41$ , 95% CI: $-1.77$ to $0.25$<br>2. $d = -0.39$ , 95% CI: $-0.58$ to $-0.19$<br>3. Reduction in mean depression scores = $-1.55$ , 95% CI: $-2.41$ to $-0.70$ | For moderate to severe MDD,<br>1. Similar efficacy to counseling<br>2. Superior as augmentation to medication alone<br>3. Monotherapy and augmentation benefits sustained long-term |
| Quah-Smith et al. | 2013 | RCT | 47  | $p < 0.001$                                                                                                                                                               | Monotherapy superior to placebo for moderate to severe MDD, but only on objective measures of depression                                                                            |

### Supplemental eTable 5.6. Evidence for St. John's wort.

| Authors       | Year | Type              | n                  | Effect Size                                          | Key Findings                                                                                                                  |
|---------------|------|-------------------|--------------------|------------------------------------------------------|-------------------------------------------------------------------------------------------------------------------------------|
| Carpenter     | 2011 | Systematic review | 17 trials, n=3,938 | $MES = 0.64$                                         | Superior to placebo for mild to moderate MDD                                                                                  |
| Rahimi et al. | 2009 | Systematic review | 13                 | WMD = $0.32$ , 95% CI: $-1.28$ – $0.64$ , $p = 0.52$ | Comparable to antidepressants for mild to severe MDD                                                                          |
| Mannel et al. | 2010 | RCT               | 200                | 1. $d = 0.33$<br>2. $p = 0.02$ ; $d = 0.61$          | For mild to moderate MDD,<br>1. Monotherapy superior to placebo<br>2. Particularly effective for moderate atypical depression |
| Sarris et al. | 2012 | RCT               | 124                | $p = 0.61$                                           | No difference between SJW, sertraline, and placebo for mild MDD or subthreshold depression                                    |

### Supplemental eTable 5.7. Evidence for Omega-3 Fatty Acids.

| Authors             | Year | Type              | n                  | Effect Size                                                                 | Key Findings                                                                                                         |
|---------------------|------|-------------------|--------------------|-----------------------------------------------------------------------------|----------------------------------------------------------------------------------------------------------------------|
| Appleton et al.     | 2015 | Meta-analysis     | 25 trials, n=1,438 | SMD = $-0.32$ , 95% CI: $-0.12$ , $-0.52$                                   | Small-to-modest effect as adjunctive compared to placebo for severe MDD                                              |
| Bloch and Hannestad | 2012 | Meta-analysis     | 13 trials, n=731   | SMD = $0.11$ , 95% CI: $-0.04$ , $0.26$                                     | No significant effect for monotherapy or augmentation in mild to moderate MDD                                        |
| Grosso et al.       | 2014 | Meta-analysis     | 11 trials, n=418   | SD = $0.47$ , 95% CI: $0.29$ , $0.66$                                       | Superior to placebo as monotherapy or augmentation for mild to severe MDD                                            |
| Sublette et al.     | 2011 | Meta-analysis     | 15 trials, n=916   | SMD for EPA $\geq 60\%$ = $0.558$ , 95% CI: $0.277$ , $0.838$ , $p = 0.001$ | EPA-dominant formulations superior to DHA-based formulations (as monotherapy or augmentation) for mild to severe MDD |
| Rocha Araujo et al. | 2010 | Systematic review | 19                 | Not reported                                                                | Mixed evidence for benefit in mild to severe MDD                                                                     |
| Sarris et al.       | 2009 | Systematic review | NR                 | Not reported                                                                | Superior to placebo as augmentation for mild to severe MDD                                                           |

|               |      |                   |   |              |                                                                |
|---------------|------|-------------------|---|--------------|----------------------------------------------------------------|
| Sarris et al. | 2010 | Systematic review | 4 | Not reported | Superior to placebo as augmentation for moderate to severe MDD |
|---------------|------|-------------------|---|--------------|----------------------------------------------------------------|

### Supplemental eTable 5.8. Evidence for SAM-e.

| Authors            | Year | Type                    | n   | Effect Size                              | Key Findings                                                                                                |
|--------------------|------|-------------------------|-----|------------------------------------------|-------------------------------------------------------------------------------------------------------------|
| Carpenter          | 2011 | Systematic review       | 9   | Mean effect size = 1.0 (range 0.33-1.60) | Monotherapy superior to placebo for mild to moderate MDD                                                    |
| De Berardis et al. | 2015 | Systematic review       | 48  | Not reported                             | Monotherapy superior to antidepressants for mild MDD<br>Effective as augmentation in moderate to severe MDD |
| Sarris et al.      | 2010 | Systematic review       | NR  | Not reported                             | Effective as augmentation in mild to severe MDD                                                             |
| Sarris et al.      | 2009 | Narrative review        | NR  | Not reported                             | Effective as augmentation in moderate to severe MDD                                                         |
| Sarris et al.      | 2015 | RCT (post-hoc analysis) | 189 | $p = 0.034$ ; $d = 0.95$                 | More effective than placebo in males, but not in females, for moderate to severe MDD                        |

### Supplemental eTable 5.9. Evidence for Tryptophan.

| Authors       | Year | Type              | n  | Effect Size  | Key Findings                                                |
|---------------|------|-------------------|----|--------------|-------------------------------------------------------------|
| Sarris et al. | 2010 | Systematic review | 9  | Not reported | Mixed evidence for augmentation in mild to severe MDD       |
| Sarris et al. | 2009 | Narrative review  | 9  | Not reported | Insufficient evidence for monotherapy in mild to severe MDD |
| Jangid et al. | 2013 | RCT               | 70 | Not reported | Similar efficacy to fluoxetine in moderate to severe MDD    |

### Supplemental eTable 5.10. Evidence for Other Natural Health Products.

| Authors                    | Year | Type              | n                  | Effect Size                                                   | Key Findings                                                                                               |
|----------------------------|------|-------------------|--------------------|---------------------------------------------------------------|------------------------------------------------------------------------------------------------------------|
| <i>Folate preparations</i> |      |                   |                    |                                                               |                                                                                                            |
| Almeida et al.             | 2015 | Meta-analysis     | 11 trials, n=2,204 | 1 long-term study: odds ratio (OR) = 0.33, 95% CI: 0.12, 0.94 | Long-term use may reduce risk of relapse<br>No effect for short-term augmentation in moderate MDD          |
| Sarris et al.              | 2010 | Systematic review | 2                  | Not reported                                                  | Effective as augmentation in moderate MDD                                                                  |
| Fava and Mischoulon        | 2009 | Narrative review  | 10                 | Not reported                                                  | Support for monotherapy or augmentation in moderate to severe MDD                                          |
| Papakostas et al.          | 2012 | Narrative review  | 11                 | Not reported                                                  | Support for augmentation with several folate forms, particularly L-methylfolate, in moderate to severe MDD |

|                                  |      |                        |                 |                                                                                                                         |                                                                                                                                                  |
|----------------------------------|------|------------------------|-----------------|-------------------------------------------------------------------------------------------------------------------------|--------------------------------------------------------------------------------------------------------------------------------------------------|
| Ginsberg et al.                  | 2011 | Retrospective analysis | 242             | $p = 0.01$                                                                                                              | L-methylfolate augmentation superior to antidepressant monotherapy in moderate MDD                                                               |
| <b><i>Inositol</i></b>           |      |                        |                 |                                                                                                                         |                                                                                                                                                  |
| Mukai et al.                     | 2014 | Meta-analysis          | 9 trials, n=242 | Not significant                                                                                                         | No benefit as monotherapy or augmentation in moderate to severe MDD and premenstrual dysphoric disorder                                          |
| Iovieno et al.                   | 2011 | Systematic review      | 6               | Not reported                                                                                                            | No benefit as monotherapy or augmentation in moderate to severe MDD                                                                              |
| Sarris et al.                    | 2010 | Systematic review      | 3               | Not reported                                                                                                            | Mixed evidence for monotherapy of augmentation in moderate to severe MDD                                                                         |
| Sarris et al.                    | 2009 | Narrative review       | 4               | Not reported                                                                                                            | No benefit as monotherapy or augmentation in moderate to severe MDD                                                                              |
| <b><i>Acetyl-L-carnitine</i></b> |      |                        |                 |                                                                                                                         |                                                                                                                                                  |
| Wang et al.                      | 2014 | Narrative review       | 8               | Not reported                                                                                                            | Monotherapy superior to placebo and comparable to fluoxetine and amisulpride for mild to severe MDD and dysthymia                                |
| <b><i>Crocus sativus</i></b>     |      |                        |                 |                                                                                                                         |                                                                                                                                                  |
| Hausenblas et al.                | 2013 | Meta-analysis          | 5 trials, n=177 | 1. $MES = -0.15$ , 95% CI: $-0.52-0.22$ , $p = 0.42$ ; n=2<br>2. $MES = 1.62$ , 95% CI: $1.10-2.14$ , $p < 0.001$ ; n=3 | For mild to moderate MDD,<br>1. Effective as monotherapy<br>2. Similar efficacy to antidepressants                                               |
| Dwyer                            | 2011 | Systematic review      | 6               | Not reported                                                                                                            | Effective as monotherapy for mild to moderate MDD                                                                                                |
| Hausenblas et al.                | 2015 | Systematic review      | 6               | Not reported                                                                                                            | Effective as monotherapy for mild to moderate MDD                                                                                                |
| Lopresti and Drummond            | 2014 | Systematic review      | 6               | Not reported                                                                                                            | Effective as monotherapy for mild to moderate MDD                                                                                                |
| Talaei et al.                    | 2015 | RCT                    | 40              | $p < 0.0001$                                                                                                            | Superior as augmentation to SSRIs vs. SSRIs alone for mild to moderate MDD                                                                       |
| <b><i>Lavandula</i></b>          |      |                        |                 |                                                                                                                         |                                                                                                                                                  |
| Nikfarjam et al.                 | 2013 | RCT                    | 80              | $p < 0.01$                                                                                                              | Lavandula combined with citalopram more effective than citalopram alone for moderate to severe MDD                                               |
| <b><i>Rhodiola rosea</i></b>     |      |                        |                 |                                                                                                                         |                                                                                                                                                  |
| Mao et al.                       | 2015 | RCT                    | 57              | 1. $p = 0.79$<br>2. OR = 1.39 (0.38-5.04)                                                                               | For mild to moderate MDD,<br>1. No difference between R. rosea, sertraline, and placebo<br>2. R. rosea superior to placebo in global improvement |
